# Supplementary material for: Identification of TIMELESS and RORA as key clock molecules of non-small cell lung cancer and the comprehensive analysis
Source: PubMed Central journal article supplement (PMC8788117; doi:10.1186/s12885-022-09203-1), 2022-01-25
Supplement: 12885_2022_9203_MOESM1_ESM.pdf [file 12885_2022_9203_MOESM1_ESM.pdf]

---

**Table S1 Genes significantly related to TIMELESS and RORA**

| TIMELESS |          | RORA      |          |
|----------|----------|-----------|----------|
| Up       | Down     | Up        | Down     |
| ESPL1    | HOPX     | TTBK2     | GALE     |
| CDK2     | ST3GAL5  | TCF4      | SLC39A4  |
| KIF18B   | SFTA2    | TSHZ2     | KRT18    |
| NCAPH    | C16orf89 | SLCO3A1   | TLCD1    |
| FANCI    | C1orf116 | PHC3      | C4orf48  |
| FOXM1    | SLC22A31 | HECA      | S100P    |
| CDC25A   | NPC2     | SLC9A9    | KRT7     |
| TICRR    | CAPN8    | SETBP1    | GPR39    |
| RAD54L   | NAPSA    | SEMA6D    | SDSL     |
| TROAP    | HNF1B    | BACH2     | STARD10  |
| CENPO    | FOLR1    | CACNA2D3  | PYCR1    |
| KIF23    | MUC1     | FOXO1     | C11orf86 |
| CHAF1A   | SFTA3    | MYO5A     | SPDEF    |
| UNG      | CFAP221  | PIK3CA    | SMIM22   |
| CDCA5    | GGTLC1   | DIPK2A    | REEP6    |
| RACGAP1  | ACSL5    | LEF1      | SMPDL3B  |
| PRC1     | PNMA2    | FGFR2     | FAM83A   |
| RFC5     | RORC     | MAF       | B3GNT3   |
| MCM2     | STEAP4   | SDK1      | MROH6    |
| BLM      | MUC21    | PTPRD     | KPNA7    |
| BUB1B    | LMO3     | EML1      | TJP3     |
| ORC1     | FMO5     | FOXN3     | CRACR2B  |
| NCAPD2   | SLC34A2  | PGAP1     | TMEM92   |
| E2F7     | TMEM125  | PLEKHG1   | HGD      |
| KIF4A    | SLC44A4  | VPS8      | MISP     |
| NEMP1    | BCL2L15  | MCC       | GOLT1A   |
| TPX2     | FCER1A   | SLC12A6   | C19orf33 |
| POLQ     | SCN7A    | TENM4     | CLDN3    |
| MCM7     | TMEM163  | SOX5      | WFDC3    |
| SPAG5    | NKX2-1   | TUB       | ALDH3B1  |
| EME1     | GLOD5    | PELI2     | PHLDA2   |
| AUNIP    | RNASE1   | ATP11B    | QPRT     |
| FEN1     | GPR39    | GLI2      | ICA1     |
| BUB1     | CISH     | MYCBP2    | VSTM2L   |
| KIFC1    | ACOX2    | BICD2     | PLEK2    |
| CDC45    | ARL6IP5  | NXPE3     | PPP1R14D |
| EXO1     | ADGRF5   | EPB41L2   | AGR2     |
| CDC6     | ALDH3B1  | KLF12     | MYEOV    |
| CDCA3    | SLC26A9  | SDK2      | NPW      |
| PSMC3IP  | RBPMS    | C20orf194 | CYP24A1  |
| RFC4     | HNMT     | SIPA1L2   | ISG15    |
| C17orf53 | CEACAM6  | WNT5A     | RORC     |

|           |           |          |          |
|-----------|-----------|----------|----------|
| HASPIN    | CD1C      | ITPKB    | MB       |
| GTSE1     | FBP1      | TBX3     | PON3     |
| SKA1      | STK32A    | TLE4     | TRIM31   |
| KIF11     | MLPH      | ACAP2    | SYT12    |
| KIF15     | SPDEF     | EDDM13   | CNTD2    |
| BRCA1     | AGR3      | SESN3    | SFTA2    |
| MCM4      | CRIP1     | ARHGAP24 | SNCG     |
| MCM10     | SLC22A3   | ADAM23   | LRG1     |
| TTK       | ARHGEF38  | ARHGAP28 | MSLN     |
| NUSAP1    | SMIM6     | HDGFL3   | TFPI2    |
| RAD51AP1  | GNA14     | ABCC5    | MUC1     |
| MCM8      | CD55      | SPARCL1  | KCNN4    |
| DTL       | CTSH      | UBXN7    | MGST1    |
| KIF14     | TMEM92    | P2RY1    | CDA      |
| INCENP    | DPP4      | NTRK2    | B3GNT6   |
| PLK4      | C1QTNF7   | KLHL24   | TMEM125  |
| ARHGAP11A | PRR15L    | CACNA2D1 | MUC21    |
| PLK1      | NINJ2     | CLDN20   | FBXO2    |
| NDC80     | PDZK1P1   | RNF217   | CST6     |
| KNL1      | SELENBP1  | NEO1     | FA2H     |
| OIP5      | SMIM22    | RCAN1    | AKR7A3   |
| CDT1      | SGMS2     | ABCA5    | BPIFA2   |
| DDIAS     | RAB27A    | SMARCA2  | HNF1B    |
| CENPA     | NDNF      | RNF168   | FGB      |
| TOPBP1    | TMPRSS2   | NHSL1    | BCL2L15  |
| XRCC2     | ALOX15B   | SLIT2    | PAEP     |
| AURKB     | DLC1      | CACHD1   | TESC     |
| CKAP2L    | NME5      | TSPAN18  | TMEM45B  |
| CDCA8     | UBXN10    | PCYT1B   | TNNC2    |
| CCNB2     | HLA-DMA   | BCL11B   | CCNJL    |
| ZWILCH    | CFI       | FAM43A   | HPN      |
| MMS22L    | CTSE      | DLG1     | DUSP4    |
| NCAPG     | PIGR      | METTL24  | RGL3     |
| CENPF     | ATOH8     | PRKX     | C15orf48 |
| RAD51     | MGP       | MID2     | FGA      |
| SGO1      | MGLL      | ADD2     | EPHX3    |
| ORC6      | HPGDS     | CTTNBP2  | PLEKHA6  |
| UHRF1     | INMT      | KLHL42   | CLDN6    |
| SPC25     | ARHGDIB   | PLCB4    | C4BPB    |
| CLSPN     | TMC5      | ZEB1     | KCNK5    |
| HJURP     | TNFRSF10C | ROBO2    | PRR15L   |
| FAM72B    | FAM20A    | TMTC1    | FGL1     |
| LMNB2     | SCTR      | GPC3     | METTL7B  |
| ZNF367    | PLAC9     | PCSK5    | TMC5     |

|         |          |          |          |
|---------|----------|----------|----------|
| CHEK1   | GNG7     | TTC14    | EREG     |
| SKA3    | RPS6KA2  | DIP2B    | GCNT3    |
| BRIP1   | MVP      | FRAS1    | FOLR1    |
| NCAPG2  | CDKL2    | COLGALT2 | GPRC5A   |
| CIP2A   | VSIG2    | NAV1     | FOXJ1    |
| HELLS   | EMB      | KIAA1671 | MLPH     |
| SENP1   | SMPDL3B  | ABCA13   | PDZK1IP1 |
| ASPM    | KCNK5    | PTCH1    | SLC22A31 |
| TOP2A   | C4BPA    | MERTK    | ACSL5    |
| ZWINT   | KCNQ3    | FZD7     | KRT81    |
| LMNB1   | SELENOW  | SVEP1    | SLC44A4  |
| DKC1    | MYBPHL   | GOLIM4   | NKX2-1   |
| FAM72A  | SUSD2    | NAP1L2   | BHMT2    |
| POLA2   | PON3     | DZIP1L   | AOC1     |
| SKP2    | SFTPBP   | CHST7    | FGG      |
| MTFR2   | C9orf152 | DST      | MUC13    |
| CENPI   | SYNE1    | USP34    | DNAJC12  |
| KIF2C   | CDH15    | TET3     | TFF1     |
| CDCA2   | TREM1    | PPM1L    | CPS1     |
| FANCD2  | PTPRE    | AMOTL1   | ARSE     |
| SMC2    | FCHO2    | STON1    | AQP3     |
| SMARCD1 | SDR16C5  | YEATS2   | MUC5B    |
| PARPBP  | IGIP     | PLA2R1   | CAPN8    |
| TMPO    | SERPINA1 | MDGA1    | LCN2     |
| CENPE   | PLA2G10  | SYNM     | SPINK1   |
| FANCB   | CYB5A    | GFOD1    | CEACAM6  |
| MSH6    | SLC4A4   | STOX2    | NAPSA    |
| POLE    | SNED1    | COL4A5   | SFTA3    |
| TRAIP   | SLC16A4  | PCYT1A   | EEF1A2   |
| ANAPC7  | RFTN1    | SLC7A8   | BPIFA1   |
| EZH2    | RHOBTB2  | RUNX3    | AZGP1    |
| ECT2    | CXCL17   | VLDLR    |          |
| WDR62   | MEF2C    | PRIMA1   |          |
| TYMS    | AK1      | ZNF462   |          |
| DSCC1   | COL4A3   | NDRG4    |          |
| CCNA2   | C10orf95 | LRRC4    |          |
| ERCC6L  | ROS1     | PCDH19   |          |
| KPNA2   | CCDC68   | PAK5     |          |
| SUV39H1 | BOK      | JAKMIP2  |          |
| MCM3    | ADGRD1   | ABCA1    |          |
| FAM83D  | AQP7     | ZNF770   |          |
| MCM6    | WFDC2    | BOC      |          |
| WDHD1   | GPRC5A   | SORL1    |          |
| MYBL2   | CXXC5    | PIK3R1   |          |

|        |          |          |  |
|--------|----------|----------|--|
| PRIM1  | SCNN1B   | DMRT2    |  |
| PRR11  | MMP28    | DENND2C  |  |
| KNTC1  | ABCC6    | MICAL3   |  |
| GINS1  | CD1E     | ARHGEF26 |  |
| GINS4  | NFE2     | NRCAM    |  |
| CSE1L  | RILP     | VANGL2   |  |
| PIMREG | TMEM150A | SOGA1    |  |
| CHAF1B | IL6ST    | ARHGEF28 |  |
| SPC24  | CLDN23   | DACH1    |  |
| ATAD5  | SPINK1   | EHD3     |  |
| CENPH  | CCNJL    | COBLL1   |  |
| KNSTRN | AQP1     | SCD5     |  |
| ASF1B  | SLC9A3R2 | BCHE     |  |
| MTBP   | SLC49A3  | JMJD7-   |  |
| SRSF9  | TGFBR2   | PLA2G4B  |  |
| PCNA   | NOSTRIN  | HEG1     |  |
| XPOT   | PIFO     | TSLP     |  |
| FBXO5  | CLIC3    | RNF152   |  |
| MKI67  | AHCYL2   | CRMP1    |  |
| LSG1   | SFXN3    | WNT2B    |  |
| GMPS   | KLF2     | PHLDB2   |  |
| MELK   | SMIM14   | PALLD    |  |
| E2F2   | SLC39A8  | ATP2B1   |  |
| SART3  | CHI3L2   | GJA1     |  |
| KIF18A | HABP2    | MARK1    |  |
| DEPDC1 | GAPT     | MAP1B    |  |
| RFWD3  | SHE      | SOX2     |  |
| NUP205 | LY86     | JARID2   |  |
| AURKA  | IFITM2   | PRR5L    |  |
| NUF2   | HPGD     | GCSAM    |  |
| NEK2   | LONRF3   | GLI1     |  |
| ESCO2  | SFTPD    | DUOX1    |  |
| PSRC1  | CHIA     | GPNMB    |  |
| STIL   | KLHDC7A  | EPHB6    |  |
| CDC20  | CCDC69   | BLMH     |  |
| BIRC5  | EMCN     | GHR      |  |
| MGME1  | PLA2G1B  | DVL3     |  |
| KMT5A  | CST5     | MYH11    |  |
| CDC7   | GOLT1A   | TGFBR3   |  |
| KIF20A | TSPAN4   | AKT3     |  |
| TRA2B  | GJB1     | NPL      |  |
| CCNF   | SOD3     | GSTM2    |  |
| TRIP13 | DNALI1   | NFE2L2   |  |
| MCM5   | FOXA2    | NMNAT3   |  |

|          |          |           |  |
|----------|----------|-----------|--|
| GIN53    | LRRN4    | PLD1      |  |
| IMMT     | CELF2    | LSAMP     |  |
| DBF4B    | ARRB1    | AASS      |  |
| UBE2S    | LRG1     | MAPKBP1   |  |
| CDK1     | CPM      | CBX6      |  |
| SGO2     | SEC14L6  | MRAP2     |  |
| PKMYT1   | CITED2   | MCOLN3    |  |
| NCAPD3   | ITGA8    | IGSF3     |  |
| DLGAP5   | CST6     | C21orf91  |  |
| TEDC2    | APOH     | JAG1      |  |
| VRK1     | STS      | PCDHGC3   |  |
| MAD2L1   | MMP24    | TMEM117   |  |
| RANBP1   | TNFSF12  | MAPK10    |  |
| MARS     | ZMYND12  | PTPN14    |  |
| PSMD11   | CRYM     | EGR2      |  |
| ATAD2    | CTSO     | TMPRSS11F |  |
| GIN52    | SLC46A2  | MATN2     |  |
| RRM2     | CST3     | KCNJ2     |  |
| DENR     | FAM107B  | NRN1      |  |
| RFC3     | CYSLTR1  | SLC2A12   |  |
| CENPM    | AGRP     | FGF2      |  |
| RBL1     | MBIP     | KIRREL1   |  |
| PTBP1    | CYP4B1   | FAM117B   |  |
| PBK      | LIMCH1   | SYNGR1    |  |
| PA2G4    | ADH1B    | PTPRZ1    |  |
| ZFP64    | TCF21    | HAS3      |  |
| PRPF19   | CX3CR1   | EIF5A2    |  |
| SSRP1    | PEBP4    | DKK3      |  |
| MIS18A   | SNTB1    | EGFL6     |  |
| RNASEH2A | SCEL     | RASSF9    |  |
| FANCG    | ARRDC3   | RGMA      |  |
| TCF19    | VSTM2L   | ADD3      |  |
| FANCA    | MSLN     | FXYD6     |  |
| DEPDC1B  | GNG11    | OLFM1     |  |
| LIG1     | KRT7     | SEMA6A    |  |
| TBC1D31  | HSPB7    | SLC35G1   |  |
| TDG      | HLA-DPB1 | TP63      |  |
| MASTL    | PAG1     | STON2     |  |
| TACC3    | CCDC170  | TMTC3     |  |
| RM12     | MAP1LC3C | GPR161    |  |
| PSMD2    | ARSE     | MAP1A     |  |
| R3HDM1   | AGR2     | KLHL13    |  |
| REPS1    | TRAM1    | BCL11A    |  |
| CHEK2    | GLRX     | TMEM246   |  |

|          |          |          |  |
|----------|----------|----------|--|
| TTF2     | ASAH1    | ABCC1    |  |
| RRM1     | HLA-DRB1 | RAET1L   |  |
| SASS6    | DRAM1    | PDZRN3   |  |
| BORA     | SLC1A7   | PYGO1    |  |
| DNAJC9   | ORM2     | INSYN1   |  |
| CKAP2    | S100B    | NFIX     |  |
| NOP56    | FAM81B   | AHNAK    |  |
| DNA2     | SIAE     | ITGB8    |  |
| EXOSC2   | TMEM45B  | GBP6     |  |
| SMC4     | CERKL    | SCARA3   |  |
| HNRNPM   | ESYT3    | ZBTB7C   |  |
| CEP55    | AQP3     | ADH7     |  |
| NUP37    | HLA-DQB1 | CD44     |  |
| C1orf112 | RCAN2    | SGK1     |  |
| CEP152   | GLB1L3   | PTPRS    |  |
| DBF4     | PLA2G12B | WNT11    |  |
| EFTUD2   | SLC46A3  | UST      |  |
| YEATS2   | RAB17    | IGSF10   |  |
| CENPN    | ATP8A1   | LRP1     |  |
| ZBTB39   | ORM1     | CREB5    |  |
| SNRPD1   | SORCS2   | LIN7A    |  |
| GEN1     | PGC      | SMOC2    |  |
| HDAC2    | ARHGAP40 | LGALS    |  |
| RNASEH1  | JAML     | ARHGEF25 |  |
| CEP78    | LGALS3   | AUTS2    |  |
| KHSRP    | CD302    | CHST2    |  |
| RCC2     | EPHA10   | CDH13    |  |
| GMNN     | CD74     | SMO      |  |
| FBXO45   | KNDC1    | KLF4     |  |
| DSN1     | HLA-DRA  | F2RL2    |  |
| TFCP2    | GALNT10  | CRYAB    |  |
| CCDC77   | LST1     | CPXM2    |  |
| CAD      | HIGD1B   | BMP7     |  |
| TIPIN    | PLD4     | DLX5     |  |
| CCNB1    | NR3C2    | FEZ1     |  |
| DVL3     | RETN     | THEMIS   |  |
| RPA1     | SCGB3A1  | DCUN1D1  |  |
| TMEM201  | SYTL2    | ADAMTS1  |  |
| OPA1     | C3       | CDHR1    |  |
| RAE1     | ACOXL    | TMCC2    |  |
| NUP107   | B3GNT8   | DIAPH2   |  |
| FAM72D   | PAM      | PAMR1    |  |
| SMPD4    | TXNIP    | DGKA     |  |
| TET3     | FHL5     | LAMA2    |  |

|         |          |         |  |
|---------|----------|---------|--|
| NOP2    | PARM1    | BTG2    |  |
| TUBA1B  | DOK4     | NOTCH1  |  |
| RECQL4  | TNNC1    | LTB4R2  |  |
| ACTL6A  | HSD17B11 | FETUB   |  |
| PSME4   | CD151    | IGF1R   |  |
| PIF1    | ELFN2    | CEP19   |  |
| SNRPA   | PGM5     | BCL2    |  |
| HAUS8   | IL37     | EMP1    |  |
| MND1    | ATP11A   | SHROOM2 |  |
| AAAS    | ITGB6    | CSRP2   |  |
| UBE2T   | SCGB3A2  | MN1     |  |
| HMGA1   | BEAN1    | OXGR1   |  |
| PRIM2   | NRP1     | LIMK2   |  |
| PPM1G   | SORBS2   | NPR2    |  |
| BRI3BP  | HLA-DQB2 | ARRDC4  |  |
| DNMT1   | DDAH1    | LRATD1  |  |
| CENPW   | PDE4C    | ABCG1   |  |
| ATP5F1B | FAXDC2   | CNTNAP2 |  |
| NOL10   | ATP10A   | ITGA6   |  |
| SNRPA1  | B3GNT6   | TENM2   |  |
| ANLN    | GPD1L    | DAPL1   |  |
| KDM2B   | SHROOM4  | XXYLT1  |  |
| KIF22   | SPINK13  | CACNA1B |  |
| WDR43   | TDRD10   | VSNL1   |  |
| SHMT2   | ABCC3    | TACC1   |  |
| CEBPG   | MFSD4A   | CALML3  |  |
| CBX1    | ADAMTS8  | PHF24   |  |
| ADIPOR2 | RGN      | DMRT3   |  |
| DIAPH3  | ZNF69    | PTGFRN  |  |
| UCK2    | MACC1    | TSPAN7  |  |
| FXR1    | KIF12    | LGI3    |  |
| SPINDOC | ANG      | HAP1    |  |
| TK1     | A2M      | FAT2    |  |
| NDC1    | CFB      | SAMD12  |  |
| E2F1    | GMFG     | COL4A6  |  |
| RUVBL1  | EPDR1    | HMCN1   |  |
| SAE1    | TJP3     | SBSPON  |  |
| SNRPF   | ENPP4    | HEY1    |  |
| POLA1   | VEPH1    | FREM2   |  |
| XPO1    | S100A4   | TRPV4   |  |
| RHNO1   | CD47     | NPTXR   |  |
| ALYREF  | ITGA9    | PTN     |  |
| H2AFZ   | CRIP2    | UGT1A7  |  |
| CTPS1   | RGCC     | FRMD6   |  |



|          |          |           |  |
|----------|----------|-----------|--|
| BRCA2    | HLA-DRB5 | LARGE1    |  |
| MTA2     | DNAJB13  | SOSTDC1   |  |
| SCML2    | DPYSL2   | DUOXA1    |  |
| WBP11    | LPCAT1   | NELL2     |  |
| CDC25C   | ICAM1    | FBLN1     |  |
| USP5     | TMEM273  | CELSR2    |  |
| WDCP     | CLIC5    | CLCA2     |  |
| SSX2IP   | SMIM1    | RAI2      |  |
| C19orf48 | HKDC1    | PTGER4    |  |
| DNAJB11  | EVA1A    | RADX      |  |
| MTIF2    | ESAM     | COPZ2     |  |
| HAT1     | B3GNT7   | LAYN      |  |
| CENPU    | NNMT     | DPYSL4    |  |
| CKAP5    | GPX3     | PLXDC2    |  |
| DHX9     | RHOA     | ACP7      |  |
| DNM1L    | MALL     | EMILIN3   |  |
| CDCA4    | TSC22D3  | GABRE     |  |
| THOP1    | HLA-DPA1 | LTB4R     |  |
| MSH2     | BTBD9    | NRG1      |  |
| SRRT     | KCNQ1    | KCTD15    |  |
| SMC1A    | SULT1A2  | PGBD5     |  |
| UMPS     | SLC44A3  | MAFB      |  |
| SET      | COL4A4   | MYLK      |  |
| XPO5     | MUCL3    | LTBP1     |  |
| ZNF384   | AQP4     | FZD6      |  |
| DHX35    | SULT1C2  | NUAK1     |  |
| COQ3     | TOR4A    | FOLH1     |  |
| ZNF639   | ALOX5AP  | SERPINB13 |  |
| USP39    | CACNA2D2 | STK32B    |  |
| RFC2     | TMPRSS6  | C14orf132 |  |
| WDR53    | GKN2     | TMEM158   |  |
| DHX33    | ADGRE5   | EGR3      |  |
| CDKN3    | TMEM173  | PKP1      |  |
| SHCBP1   | SERPINB1 | SNCA      |  |
| ILF3     | TESC     | MSRB3     |  |
| RPAP3    | CLDN2    | PIGX      |  |
| WDR75    | C7       | TPRG1     |  |
| EIF4G1   | S1PR4    | IGFBP5    |  |
| PNPT1    | CA13     | SIAH2     |  |
| SMC6     | ME3      | FZD1      |  |
| MYO19    | MAMDC2   | PTPN13    |  |
| MRPL47   | GRAMD2A  | DSG3      |  |
| POP1     | CASS4    | TFRC      |  |
| H2AFX    | AOC3     | LRP4      |  |

|          |          |           |  |
|----------|----------|-----------|--|
| TUBG1    | ALDH2    | EFS       |  |
| DIP2B    | C4B      | TRIB2     |  |
| CCDC86   | SHISA3   | ACSS1     |  |
| HNRNPR   | DUSP1    | CNTN1     |  |
| UBE2C    | CLEC3B   | DYNC111   |  |
| U2AF2    | CSDC2    | SCN4B     |  |
| WDR5     | SPTLC3   | GNAZ      |  |
| HMGB2    | OCLN     | MB21D2    |  |
| CCDC34   | KCNN4    | CD200     |  |
| UPF3B    | TENT5C   | EPHB3     |  |
| NUP153   | ABCA8    | DDR2      |  |
| LTV1     | LRRK2    | NKAIN2    |  |
| TUBA1C   | ANKDD1B  | WASF1     |  |
| PRPF4    | C1orf210 | HR        |  |
| DNAJC14  | CA3      | PLA2G4F   |  |
| SELENOI  | ICAM2    | SLC37A2   |  |
| RBM28    | TNFSF13  | KRT5      |  |
| CCDC138  | ENPP5    | DLX6      |  |
| DDX39A   | ATAD3C   | KRT6B     |  |
| TUBB     | VAMP5    | CYB5R2    |  |
| CENPL    | PON2     | TIAM1     |  |
| RSRC1    | TLR2     | NPR3      |  |
| FAAP24   | CABCOCO1 | PLCXD2    |  |
| TAF5     | RGL3     | ZNF750    |  |
| DEK      | KLRB1    | LRP12     |  |
| IGF2BP3  | DNAH5    | DSC3      |  |
| UBA2     | CSRNP1   | KCTD1     |  |
| TFRC     | CREB3L1  | GABRQ     |  |
| PRKDC    | TREM2    | LARP6     |  |
| ARHGEF39 | HLA-DMB  | CERS3     |  |
| KIF24    | CD1A     | GPRC5B    |  |
| DHX37    | SFTPA1   | ASAP2     |  |
| PGAM5    | CXCL2    | GPRC5D    |  |
| RIOK1    | CD52     | PDPN      |  |
| C18orf54 | C11orf96 | DNASE1L3  |  |
| INTS13   | FMN1     | TMPRSS11D |  |
| SEN2     | RRAD     | PARD6G    |  |
| RMND5A   | ACSM3    | SLC1A4    |  |
| BLMH     | LY96     | MTCL1     |  |
| FKBP4    | CRACR2B  | ENTPD3    |  |
| XXYL1    | GPSM3    | CCND2     |  |
| NAA50    | EFCC1    | CLSTN2    |  |
| GPI      | SLC41A2  | TMPRSS11A |  |
| DVL2     | ENC1     | IGSF11    |  |

|          |          |            |  |
|----------|----------|------------|--|
| TBCCD1   | BANK1    | ANTXR1     |  |
| KPNB1    | RASL12   | B3GNT5     |  |
| TESMIN   | DPYD     | KIAA1549L  |  |
| NUP155   | SLC1A1   | SOX21      |  |
| NUDT1    | C4A      | FAM110C    |  |
| PTTG1    | MICAL2   | WIPF3      |  |
| DLX6     | FAM189A2 | CHRM3      |  |
| CKS1B    | HSD17B6  | LPAR3      |  |
| NSD2     | C5orf49  | SOST       |  |
| IQGAP3   | TLR3     | JAKMIP3    |  |
| GTF2H3   | KCNA3    | MTSS1      |  |
| PCLAF    | TMEM130  | B4GALT4    |  |
| PATL1    | CSF2RA   | SCN9A      |  |
| FANCE    | LRRC31   | NDRG2      |  |
| FANCC    | HPN      | DPYSL3     |  |
| GFM1     | PYROXD2  | IGFBP2     |  |
| GTF3C5   | SGCA     | SLIT3      |  |
| DDX55    | RGS5     | EPHA4      |  |
| NABP2    | WFDC10B  | MPPED1     |  |
| TOMM40   | SNTN     | LMO4       |  |
| STMN1    | GPRC5C   | ROR2       |  |
| FBL      | MS4A2    | CCDC3      |  |
| KIF20B   | CD207    | KRT6C      |  |
| ABCF3    | MUC3A    | GRHL3      |  |
| RAD51C   | OGN      | NKD2       |  |
| TCP1     | SLC43A3  | SPRR3      |  |
| WASF1    | CEACAM4  | ATP12A     |  |
| SPDL1    | MCEMP1   | ALDH1A1    |  |
| CCT7     | CTSS     | NUDT10     |  |
| TMTC3    | FUCA1    | DLL1       |  |
| NOL11    | DAAM2    | NECTIN1    |  |
| HSPD1    | GAS2L2   | PRNP       |  |
| MPHOSPH9 | SFTPA2   | ST6GALNAC2 |  |
| SENP5    | FCGBP    | FHL1       |  |
| DHX36    | XKRX     | CYP2S1     |  |
| MTHFD2   | COLEC12  | EPB41L3    |  |
| PARP1    | C1orf162 | SLC22A23   |  |
| DNAJC2   | PPP1R1B  | GOLGA8A    |  |
| AFG3L2   | VDR      | GLYATL2    |  |
| TEX10    | JCHAIN   | WNT3A      |  |
| TRIM28   | ZBTB16   | CYP26A1    |  |
| PHGDH    | DEPTOR   | SPRR2A     |  |
| ANAPC1   | RHEX     | SHISA2     |  |
| RNF168   | RPH3AL   | SNAI2      |  |

|         |           |           |  |
|---------|-----------|-----------|--|
| CEP85   | LPL       | SUSD4     |  |
| CS      | CSF2      | ZNF703    |  |
| ATP2B1  | ZNF385B   | HK2       |  |
| RANGAP1 | FLRT3     | IL7R      |  |
| TRMT6   | SLC6A14   | ZNF385A   |  |
| TARS    | MEOX2     | BEX2      |  |
| PUS7    | EVI2A     | STXBP6    |  |
| ADCY3   | MISP3     | BTBD11    |  |
| LIG3    | CPB2      | PTHLH     |  |
| KCMF1   | FBLN5     | FBN2      |  |
| TONSL   | CAPN9     | MLLT11    |  |
| LIN9    | MFAP4     | WNK2      |  |
| SIAH2   | ERP27     | H2AFY2    |  |
| CEP76   | ERICH2    | TNFRSF13C |  |
| YARS2   | S100A6    | FOXE1     |  |
| RCCD1   | TCIM      | PDGFRA    |  |
| NONO    | NCMAP     | BNC1      |  |
| AMER1   | ADAMTSL2  | BEX4      |  |
| PSME3   | RASGRF1   | SEPTIN5   |  |
| TTL     | PRR29     | LY6G6C    |  |
| ACAT2   | ABCA3     | FAM171A1  |  |
| MAZ     | NRGN      | PLA2G3    |  |
| PAK2    | BMP5      | PLCH2     |  |
| STRAP   | C6        | COL7A1    |  |
| SPATS2  | PODN      | SLC1A3    |  |
| PSAT1   | RAB37     | RARB      |  |
| CMAS    | C16orf54  | CD109     |  |
| CHERP   | CLIC2     | DIRAS2    |  |
| NUP62   | MS4A15    | SPRR1A    |  |
| HMGCS1  | HHLA2     | ACKR3     |  |
| HAUS6   | VSIG1     | KRT13     |  |
| SAPCD2  | NCF4      | USH1G     |  |
| ESF1    | ALOX5     | E2F7      |  |
| FOXRED2 | CCL23     | NELL1     |  |
| VTA1    | ITGA3     | S1PR5     |  |
| UBXN7   | FABP3     | RAB3B     |  |
| CENPK   | ZMAT1     | CECR2     |  |
| HMCES   | TNFAIP8L2 | NPNT      |  |
| SUZ12   | PCDH1     | NID1      |  |
| BRD4    | SEMA3B    | PNCK      |  |
| PIGX    | TMEM100   | C10orf99  |  |
| TRMT61B | CPAMD8    | SCUBE2    |  |
| FIGNL1  | ADGRF1    | WFDC5     |  |
| QTRT2   | TENT5A    | FAM171B   |  |

|          |          |          |  |
|----------|----------|----------|--|
| HAUS5    | CLIC6    | GDA      |  |
| UBE2O    | MROH6    | FST      |  |
| NCBP2    | RASSF7   | AOAH     |  |
| SPAST    | SLC16A7  | HBEGF    |  |
| EIF2B5   | LMO7     | FRRS1    |  |
| C15orf41 | DEPP1    | CSTA     |  |
| OTX1     | LMOD1    | IRX6     |  |
| SUV39H2  | SDC4     | IQCA1    |  |
| NCL      | HSH2D    | CD9      |  |
| DNMT3B   | IRX5     | HMGCS1   |  |
| CMSS1    | PRSS8    | FGFBP2   |  |
| C5orf34  | FNIP2    | FAM83B   |  |
| SYNCRIP  | GLB1L2   | P3H2     |  |
| POFUT1   | PLAAT4   | NGFR     |  |
| ANP32B   | FRZB     | FBXO27   |  |
| SAP130   | AQP5     | SOCS2    |  |
| GTF3C3   | COX4I2   | NUDT11   |  |
| SBNO1    | MYBPH    | SLC9A2   |  |
| LYAR     | RASEF    | EGR1     |  |
| E2F6     | ELN      | MSI1     |  |
| POLE2    | ATP13A4  | ARHGAP23 |  |
| THOC3    | DUSP6    | TGM1     |  |
| PDSS1    | RND1     | TGM3     |  |
| KLHL42   | C9orf135 | SLC6A8   |  |
| QSOX2    | CCR2     | SLC47A1  |  |
| LRRC58   | PID1     | PRSS12   |  |
| KPNA4    | PDK4     | ARTN     |  |
| POC1A    | C19orf33 | SERPINE2 |  |
| TNPO2    | EVI2B    | ZNF711   |  |
| CDK16    | ERN2     | GPC1     |  |
| KPNA1    | PRG4     | SDC2     |  |
| PSMD3    | CD164L2  | RAB6B    |  |
| PAICS    | CACNA1D  | ADAM12   |  |
| ARL6IP6  | CFTR     | A2ML1    |  |
| CCDC58   | PTPN22   | SPRR2E   |  |
| CCNE1    | GOLGA7B  | DACT2    |  |
| SAAL1    | UNC5CL   | TRIM29   |  |
| ATP13A3  | OTULINL  | LAMA1    |  |
| NAA25    | MILR1    | PGLYRP3  |  |
| CDH24    | PTPRU    | ROBO1    |  |
| CDK4     | ICA1     | HLF      |  |
| FOXK2    | RNASE6   | HSPB3    |  |
| SUDS3    | TM4SF4   | TPPP     |  |
| KNOP1    | GAL3ST1  | SPRR1B   |  |

|         |            |          |  |
|---------|------------|----------|--|
| HMGXB4  | FOXJ1      | NSG1     |  |
| TCOF1   | PRDM16     | GSTA4    |  |
| NELFCD  | FUT3       | ATP1B3   |  |
| CENPP   | PPP1R14D   | POMC     |  |
| POLD3   | TFPI       | NEFL     |  |
| RAN     | PTGER2     | CES1     |  |
| NCBP1   | GPR34      | FOXN1    |  |
| ZMYND19 | SLC6A20    | C12orf75 |  |
| SLC38A1 | GPD1       | MXRA5    |  |
| FGD1    | MRC1       | PLPPR1   |  |
| ZC3H8   | BICDL2     | HSPG2    |  |
| ALG3    | TSPAN8     | KCNJ15   |  |
| MFN1    | CLDN3      | ADRA2B   |  |
| TSR1    | C4BPB      | FOXD1    |  |
| ACAP2   | ZNF626     | LOXL4    |  |
| FAM136A | FAM216B    | CDK6     |  |
| APEX2   | NT5E       | GJB6     |  |
| TPRKB   | EDNRB      | FAM83F   |  |
| ERAL1   | FOLR2      | SULF2    |  |
| POLD1   | GPIHBP1    | NPPC     |  |
| CCT5    | HLA-DOA    | ARNT2    |  |
| CARM1   | ZMYND10    | SPOCK1   |  |
| SLC5A6  | PIP5KL1    | FMO2     |  |
| MARK1   | RSPH1      | POU2AF1  |  |
| EIF4A3  | IYD        | KRT6A    |  |
| IPO9    | KBTBD11    | SPRR2D   |  |
| JARID2  | PLN        | IGF2BP2  |  |
| WNK2    | PIP        | AADAC    |  |
| CASP2   | REEP6      | EFNB1    |  |
| KDM1A   | IRX3       | FZD10    |  |
| NUP93   | BATF       | CDH26    |  |
| FIP1L1  | CLTRN      | COLCA2   |  |
| CHTF18  | TNXB       | FABP5    |  |
| SUPT16H | PLEKHB1    | DSC2     |  |
| PIK3R4  | SERPIND1   | PGF      |  |
| MLF2    | HOXD1      | CEL      |  |
| URB2    | COL8A1     | KRT15    |  |
| SOGA1   | TOX3       | SV2A     |  |
| VRK2    | ARSD       | CCNA1    |  |
| NDUFAF4 | ENPP3      | COL6A3   |  |
| FYTTD1  | DDIT4L     | C6orf15  |  |
| DDX11   | PHYHD1     | GPR27    |  |
| PLAGL2  | DES        | THBD     |  |
| STARD7  | SLC22A18AS | EN1      |  |

|          |          |          |  |
|----------|----------|----------|--|
| NCBP2AS2 | HHIP     | PENK     |  |
| PUS1     | BAAT     | SLC4A11  |  |
| GANAB    | HLA-DQA1 | CAPNS2   |  |
| PDAP1    | GJA5     | EYA2     |  |
| CENPJ    | TLE2     | SLC9A3R1 |  |
| NEDD1    | MMRN1    | RND3     |  |
| ZGRF1    | RTN4RL2  | TNFRSF19 |  |
| KDM3A    | GDF10    | GAS1     |  |
| PTDSS1   | NMNAT2   | CHRD1    |  |
| SNRPD3   | NPR1     | GAST     |  |
| SF3B3    | TGM2     | HCAR2    |  |
| SOX2     | CCL17    | MFAP4    |  |
| RPF2     | DAW1     | MSC      |  |
| POLR2H   | ECRG4    | GABRA3   |  |
| SMARCB1  | DTX4     | RAPGEFL1 |  |
| HMMR     | CADPS2   | CALB2    |  |
| U2SURP   | WFDC3    | IRF6     |  |
| CLCN2    | CLDN18   | NTS      |  |
| LRPPRC   | PLCH1    | WDR72    |  |
| FAM111B  | TRPC6    | NDUFA4L2 |  |
| NOP58    | LIPH     | SPRR2G   |  |
| EXOSC3   | SSC5D    | TNFSF10  |  |
| ECE2     | PTGDS    | ADM      |  |
| MAP6D1   | TMED6    | SPON1    |  |
| LCLAT1   | TBX4     | SELENOP  |  |
| CSRP2    | PODNL1   | SCG2     |  |
| DONSON   | FAM177B  | ITGA2    |  |
| TOP3A    | SPATA18  | HOXD11   |  |
| RAD23A   | VWA2     | FAM83C   |  |
| SLC16A1  | ADRA2A   | NXPH4    |  |
| ATXN2L   | COBL     | DIO2     |  |
| TMEM189  | C2       | KCNG1    |  |
| UBAC1    | C7orf57  | TMEM40   |  |
| GAPDH    | MMP15    | HOXD13   |  |
| ACAD9    | IGSF6    | SPINK5   |  |
| DBR1     | EFNA5    | ALDH3A1  |  |
| SNRNP200 | ITM2A    | TINCR    |  |
| HDHD5    | CCL13    | HOXD10   |  |
| RBBP7    | CSF3R    | NRARP    |  |
| ELK1     | OLFML3   | KLRG2    |  |
| PES1     | BAIAP3   | CA12     |  |
| B3GNT5   | MISP     | CPA3     |  |
| ANKRD52  | OLR1     | PERP     |  |
| DHX34    | CD300LF  | KRT16    |  |

|         |          |          |  |
|---------|----------|----------|--|
| CBX2    | KCTD14   | GSTM3    |  |
| XRCC3   | CLEC10A  | B4GALNT1 |  |
| PHF6    | MS4A8    | NTN1     |  |
| NAT10   | TMC4     | AMTN     |  |
| CRKL    | KPNA7    | WIF1     |  |
| MRPL3   | FCMR     | KRTDAP   |  |
| CTSV    | NR0B2    | CYP4F3   |  |
| CSTF2   | LPIN2    | TNC      |  |
| SNRPB   | KDR      | SBSN     |  |
| TIMM44  | SPNS2    | IGSF9    |  |
| DDX49   | CLDN9    | CX3CL1   |  |
| CCNT1   | CST2     | COL14A1  |  |
| SMC3    | RASD1    | RHCG     |  |
| CPSF4   | NTN4     | SERPINB5 |  |
| CNOT3   | AZGP1    | GRP      |  |
| LRRRC8D | FAM92B   | FGFR3    |  |
| SAMD4B  | CIITA    | CHP2     |  |
| ABCC5   | CADM1    | IL36G    |  |
| MTERF3  | C20orf85 | SOHLH1   |  |
| HDAC1   | MNDA     | GJB5     |  |
| TPI1    | CGN      | KRT31    |  |
| PRPSAP1 | CGNL1    | IVL      |  |
| KRI1    | DMBT1    | LAMA3    |  |
| RAD21   | PLEKHA6  | ARHGEF4  |  |
| CCDC150 | TNFSF15  | KRT17    |  |
| ARTN    | CAPS     | CYP2C18  |  |
| UBXN2A  | FCN1     | FMO3     |  |
| TDP1    | CAPN5    | TPD52L1  |  |
| GAREM2  | SLPI     | LGR5     |  |
| TMEM237 | COMP     | IL1RN    |  |
| TWNK    | TUBA4B   | COL17A1  |  |
| NUDT15  | ABI3BP   | SLC16A1  |  |
| CEP97   | FBXO2    | CXCL14   |  |
| HCFC1   | RAB27B   | SERPINB2 |  |
| ZW10    | GEM      | POF1B    |  |
| CSNK2A1 | GPR183   | ANXA8    |  |
| RMI1    | EPHX3    | PI3      |  |
| TFAP4   | CD69     | DQX1     |  |
| PNO1    | ERRFI1   | PPP2R2C  |  |
| NUP188  | AMIGO2   | RBP1     |  |
| SMARCD2 | VEGFD    | MAGEA11  |  |
| CCNE2   | FOS      | XG       |  |
| DCUN1D1 | MST1R    | SIX2     |  |
| ALG10   | MACROD2  | KRT14    |  |



|          |            |          |  |
|----------|------------|----------|--|
| LSM14A   | ACKR1      | PHGDH    |  |
| TCF3     | CYP27A1    | RNASE7   |  |
| ZNF131   | PMEPA1     | F13A1    |  |
| EHBP1    | AOC1       | IGFL1    |  |
| PPAT     | MXRA8      | NIPAL4   |  |
| MIEF1    | SLAIN1     | PPP1R14C |  |
| BRIX1    | HID1       | TSPYL5   |  |
| ATP2C1   | GALNT5     | MMP10    |  |
| CCT4     | ISM1       | VTCN1    |  |
| HBS1L    | TFPI2      | CLDN1    |  |
| METTL8   | MYO1G      | FOSB     |  |
| NLE1     | ADORA1     | UPK1B    |  |
| DUS3L    | BTC        | CRCT1    |  |
| ODF2     | DNAJC12    | SFRP1    |  |
| MAGEF1   | TYROBP     | ULBP2    |  |
| C12orf56 | TEKT1      | CYP4F11  |  |
| ADAM17   | ST6GALNAC1 | SOX15    |  |
| TGIF2    | HSPB6      | COL12A1  |  |
| GGH      | TSPAN12    | UGT1A6   |  |
| DLG1     | AGT        | TMPRSS4  |  |
| GPR19    | SLCO2A1    | C7       |  |
| USP1     | PLEKHS1    | NOS2     |  |
| PARL     | SFTPC      | LGALS7   |  |
| PRAME    | TCEA3      | LGALS7B  |  |
| FANCL    | MUC5B      | SPRR2F   |  |
| AGO2     | TNFRSF12A  | SERPINB3 |  |
| NUP50    | CRTAC1     | GSTA1    |  |
| MDH1     | ZNF117     | SLC2A1   |  |
| DDX54    | UCN3       | MMP3     |  |
| ZNF318   | PRELP      | FGFBP1   |  |
| DLX5     | IL33       | AKR1B10  |  |
| HDGFL3   | VASN       | KRT75    |  |
| WIZ      | SPON1      | SERPINB7 |  |
| NEIL3    | GDF15      | FXD3     |  |
| TAF2     | CCL22      | LYPD3    |  |
| TMEM185B | MAB21L4    | AKR1C1   |  |
| MAPK6    | SH3BGRL2   | S100A2   |  |
| FARSA    | TMEM61     | ADH1B    |  |
| CCDC137  | MSR1       | MMP12    |  |
| PDCD5    | HGD        | GPX2     |  |
| HPRT1    | AGER       | PRAME    |  |
| PAK1IP1  | SLC40A1    | SERPINB4 |  |
| TBPL1    | TMEM119    | LTF      |  |
| STIP1    | MARCO      | CALML5   |  |

---

|          |          |         |  |
|----------|----------|---------|--|
| NASP     | TNFRSF17 | TNS4    |  |
| ATP11B   | BMP2     | GPR87   |  |
| DOT1L    | CDC42EP5 | S100A7  |  |
| PRMT1    | PTK6     | AKR1C2  |  |
| ASAP1    | PHACTR3  | MAGEA4  |  |
| PRICKLE3 | SCGB2A1  | AKR1C3  |  |
| E2F8     | C1orf189 | SCGB1A1 |  |
| TGS1     | RAP1GAP  |         |  |
| PFN2     | CHRDL1   |         |  |
| IQCB1    | CPA3     |         |  |
| BCL7A    | LTK      |         |  |
| HAP1     | BSPRY    |         |  |
| NRM      | CAPN13   |         |  |
| ZC3HAV1L | C1orf194 |         |  |
| GNGT1    | BRINP1   |         |  |
| HYLS1    | HP       |         |  |
| TIMM8A   | ATP2C2   |         |  |
| FBXO43   | DPT      |         |  |
| CLPB     | MT1E     |         |  |
| MDC1     | ASPHD1   |         |  |
| CASP8AP2 | PAEP     |         |  |
| ZNF74    | ECHDC3   |         |  |
| DNMT3A   | TMEM59L  |         |  |
| PEX5     | METTL7B  |         |  |
| GSK3B    | MORN5    |         |  |
| SMO      | HBB      |         |  |
| KIF3C    | GADD45G  |         |  |
| ABCC1    | PPBP     |         |  |
| PELP1    | ZNF486   |         |  |
| STC2     | BMP3     |         |  |
| MSI1     | PTPRN2   |         |  |
| MRGBP    | LGSN     |         |  |
| PSMC4    | CAMK2N1  |         |  |
| ALKBH2   | AREG     |         |  |
| SLC2A1   | PALM3    |         |  |
| PXYLP1   | WDR38    |         |  |
| FAM222A  | TNNC2    |         |  |
| ZNF777   | PCP4     |         |  |
| SAFB     | TSPAN1   |         |  |
| GTPBP3   | BCAS1    |         |  |
| IPPK     | LCN2     |         |  |
| TNPO3    | ALPL     |         |  |
| UNC119   | FMO2     |         |  |
| RPAP1    | SYT12    |         |  |

---

|          |          |  |  |
|----------|----------|--|--|
| ZNF343   | GCNT3    |  |  |
| RNF26    | VSIG4    |  |  |
| ASNS     | SPAG6    |  |  |
| UBAP2    | TRNP1    |  |  |
| FAM83F   | PLAAT3   |  |  |
| ANKRD13B | C11orf86 |  |  |
| SMIM13   | MMP7     |  |  |
| HOXD13   | TPSB2    |  |  |
| PARP2    | SCGB1A1  |  |  |
| ZNF146   | ASPN     |  |  |
| FAM189B  | ALPK3    |  |  |
| HSF2     | FABP4    |  |  |
| PIK3CA   | C9orf24  |  |  |
| NXPH4    | CH25H    |  |  |
| IGSF9    | RAMP1    |  |  |
| MICAL3   | LDLRAD1  |  |  |
| FAM234B  | FGG      |  |  |
| DDX10    | HBA2     |  |  |
| LYPD6    | B3GNT3   |  |  |
| SMG7     | BPIFB1   |  |  |
| DIPK2A   | MUC5AC   |  |  |
| MTMR1    | ACHE     |  |  |
| PGAP1    | CRLF1    |  |  |
| CKS2     | TPPP3    |  |  |
| RPIA     | LGALS4   |  |  |
| COLGALT1 | RNF128   |  |  |
| CEP250   | AMBP     |  |  |
| SLC6A8   | FXD4     |  |  |
| RDM1     | BPIFA2   |  |  |
| B4GALT6  | LYZ      |  |  |
| BYSL     | FAM83A   |  |  |
| TMEM38B  | SFRP4    |  |  |
| AGBL5    | CDA      |  |  |
| TFDP1    | S100P    |  |  |
| PCYT1A   | CP       |  |  |
| EPOP     | BPIFA1   |  |  |
| ABCF1    | CEACAM5  |  |  |
| YWHAG    | EREG     |  |  |
| WDR4     | PCP4L1   |  |  |
| SINHCAF  | TFF3     |  |  |
| MLLT11   | BHMT2    |  |  |
| LSM4     | HLA-DQA2 |  |  |
| PPME1    | KIT      |  |  |
| KLHL13   | COL10A1  |  |  |

---

|          |        |  |  |
|----------|--------|--|--|
| ANKRD27  | CHIT1  |  |  |
| ATG4D    | CCL19  |  |  |
| PPIF     | MMP13  |  |  |
| POLD2    | FGL1   |  |  |
| SLC7A1   | TCN1   |  |  |
| KLC2     | FGA    |  |  |
| POLR1A   | TFF1   |  |  |
| ZNF507   | CRABP2 |  |  |
| MED30    | EEF1A2 |  |  |
| MRPS22   |        |  |  |
| PTPN11   |        |  |  |
| STK35    |        |  |  |
| FAM83B   |        |  |  |
| PHF8     |        |  |  |
| GCN1     |        |  |  |
| AP2M1    |        |  |  |
| AHCY     |        |  |  |
| GIT1     |        |  |  |
| CEP72    |        |  |  |
| GABRA3   |        |  |  |
| TAF1A    |        |  |  |
| POLE3    |        |  |  |
| MSL2     |        |  |  |
| OXGR1    |        |  |  |
| DNAJC19  |        |  |  |
| ACLY     |        |  |  |
| CHRM3    |        |  |  |
| LRP4     |        |  |  |
| FAM20B   |        |  |  |
| PITPNB   |        |  |  |
| DSP      |        |  |  |
| NRARP    |        |  |  |
| SMIM10L1 |        |  |  |
| CBFA2T2  |        |  |  |
| TRIM25   |        |  |  |
| B3GALNT2 |        |  |  |
| CORO1C   |        |  |  |
| C20orf27 |        |  |  |
| IGF2BP2  |        |  |  |
| CD3EAP   |        |  |  |
| CDV3     |        |  |  |
| PRRC2B   |        |  |  |
| LRRC1    |        |  |  |
| NCOA6    |        |  |  |

---

|                                                                                                                                                                                                                                                                                                                                                                                                                         |  |  |  |
|-------------------------------------------------------------------------------------------------------------------------------------------------------------------------------------------------------------------------------------------------------------------------------------------------------------------------------------------------------------------------------------------------------------------------|--|--|--|
| EMC1<br>SFXN1<br>ZNF280C<br>ASAP2<br>DROSHA<br>NDE1<br>RBM19<br>SLC3A2<br>KCTD1<br>PIGW<br>CHAC2<br>QSER1<br>CACNA1B<br>MRPL51<br>NSUN2<br>BOLA3<br>CSNK1G1<br>PDCD10<br>TMEM117<br>TEAD4<br>TCF20<br>APPL2<br>PDRG1<br>POM121<br>RPL39L<br>PREP<br>RAVER1<br>USP31<br>C19orf47<br>ALMS1<br>RECQL<br>IGSF11<br>WDR72<br>NFE2L1<br>METAP1<br>GCLC<br>SMS<br>FAM131C<br>SLC7A5<br>GDAP1<br>RCOR2<br>DARS2<br>CENPQ<br>LBR |  |  |  |
|-------------------------------------------------------------------------------------------------------------------------------------------------------------------------------------------------------------------------------------------------------------------------------------------------------------------------------------------------------------------------------------------------------------------------|--|--|--|

---

|                                                                                                                                                                                                                                                                                                                                                                                                                            |  |  |  |
|----------------------------------------------------------------------------------------------------------------------------------------------------------------------------------------------------------------------------------------------------------------------------------------------------------------------------------------------------------------------------------------------------------------------------|--|--|--|
| TRIM59<br>IARS<br>TEDC1<br>B4GALT4<br>GEMIN4<br>SEM1<br>HEATR1<br>HOXA1<br>TULP3<br>RBBP8<br>CAND1<br>PFKM<br>CKAP4<br>SAMD1<br>FOXD1<br>ATP2A2<br>HSPA4L<br>PCCB<br>CCSAP<br>TBL1XR1<br>YES1<br>DCUN1D5<br>ZNF488<br>PRKX<br>TTLL12<br>CAMSAP1<br>SV2A<br>ADAM23<br>POP7<br>HIC2<br>POM121C<br>CEP19<br>DHCR7<br>YEATS4<br>ZNF695<br>CCDC85C<br>FBXO27<br>BARD1<br>DHFR<br>CHORDC1<br>SF3A2<br>PPT2<br>FAM210A<br>TMEM14A |  |  |  |
|----------------------------------------------------------------------------------------------------------------------------------------------------------------------------------------------------------------------------------------------------------------------------------------------------------------------------------------------------------------------------------------------------------------------------|--|--|--|

---

|                                                                                                                                                                                                                                                                                                                                                                                                                  |  |  |  |
|------------------------------------------------------------------------------------------------------------------------------------------------------------------------------------------------------------------------------------------------------------------------------------------------------------------------------------------------------------------------------------------------------------------|--|--|--|
| NHSL1<br>SH3BP1<br>ATR<br>ATP1B3<br>LARP6<br>MARS2<br>CDK5R1<br>COL7A1<br>STAG1<br>MTCL1<br>NADK2<br>AEBP2<br>VPS8<br>CASTOR2<br>LRR1<br>TIMMDC1<br>HSPE1<br>ARID3B<br>PHF5A<br>BCL2L12<br>FOXO1<br>EIF4EBP1<br>PCDH19<br>CCT6A<br>DPF1<br>KCTD3<br>PIR<br>RCN2<br>TOMM5<br>SIM2<br>ELOVL4<br>TMEM44<br>TENT4A<br>MPP2<br>LSM14B<br>DMRT2<br>DTYMK<br>PKP4<br>NRCAM<br>PRMT5<br>LRP8<br>KRT74<br>FGF12<br>OTUD6B |  |  |  |
|------------------------------------------------------------------------------------------------------------------------------------------------------------------------------------------------------------------------------------------------------------------------------------------------------------------------------------------------------------------------------------------------------------------|--|--|--|

---

|                                                                                                                                                                                                                                                                                                                                                                                                                                      |  |  |  |
|--------------------------------------------------------------------------------------------------------------------------------------------------------------------------------------------------------------------------------------------------------------------------------------------------------------------------------------------------------------------------------------------------------------------------------------|--|--|--|
| ATP23<br>FAM169A<br>AP3M2<br>PHLPP1<br>ZNF385A<br>YBX1<br>DLG5<br>KIF21A<br>PLD1<br>COMMD2<br>NAB1<br>WDR18<br>USP28<br>C19orf54<br>SOX21<br>DYNC111<br>ZBTB5<br>REXO5<br>HSP90AA1<br>CEP192<br>RNF126<br>HOXD11<br>SLC25A33<br>ACYP1<br>ICK<br>GABRQ<br>MEST<br>LIPT2<br>MELTF<br>GPR63<br>NTRK2<br>DRG1<br>CNTNAP2<br>C3orf67<br>LRP12<br>APOBEC3B<br>SLCO1A2<br>B4GALNT1<br>NKAIN2<br>YDJC<br>DHRS13<br>PHB2<br>DDIT3<br>ANKRD18B |  |  |  |
|--------------------------------------------------------------------------------------------------------------------------------------------------------------------------------------------------------------------------------------------------------------------------------------------------------------------------------------------------------------------------------------------------------------------------------------|--|--|--|



---

|                                                                                                                                                                                                                                                                                                                                                                                                                      |  |  |  |
|----------------------------------------------------------------------------------------------------------------------------------------------------------------------------------------------------------------------------------------------------------------------------------------------------------------------------------------------------------------------------------------------------------------------|--|--|--|
| WDR76<br>APOO<br>GNA13<br>MTHFD1L<br>PNCK<br>CPOX<br>ADAMTS20<br>CSNK1G2<br>SERPINB5<br>ECSIT<br>CLTCL1<br>SNRPG<br>TFDP2<br>RFX7<br>VANGL2<br>TRMT10C<br>NIPSNAP1<br>ASIC1<br>RAB3B<br>GLTP<br>NECTIN1<br>SKA2<br>CDCA7<br>KIF7<br>TMEM41A<br>TWF1<br>LRFN1<br>PAK1<br>HOXA10<br>CLUH<br>FAM162A<br>E2F3<br>CLASP1<br>GOLIM4<br>ADSL<br>SARS2<br>MBD3<br>BOP1<br>S1PR5<br>DSC3<br>SUGP2<br>M6PR<br>MICALL1<br>KEAP1 |  |  |  |
|----------------------------------------------------------------------------------------------------------------------------------------------------------------------------------------------------------------------------------------------------------------------------------------------------------------------------------------------------------------------------------------------------------------------|--|--|--|

---

|                                                                                                                                                                                                                                                                                                                                                                                                          |  |  |  |
|----------------------------------------------------------------------------------------------------------------------------------------------------------------------------------------------------------------------------------------------------------------------------------------------------------------------------------------------------------------------------------------------------------|--|--|--|
| DCAKD<br>PDCD11<br>DUSP14<br>PGM2<br>B4GALNT4<br>BICD2<br>MYBBP1A<br>ZNF770<br>ERF<br>MIB1<br>NSD3<br>CCT2<br>SRSF12<br>MTA1<br>GNL3L<br>HOXC8<br>HK2<br>KCNG1<br>NT5DC3<br>MYNN<br>TAF4B<br>EIF5A2<br>H1FX<br>ADAM11<br>GPSM2<br>STOML2<br>PAK4<br>AMMECR1<br>TRIM45<br>MAFG<br>FAM83G<br>HRAS<br>ZIC5<br>ZNF711<br>STRBP<br>URI1<br>PERP<br>NMD3<br>DTNB<br>REEP4<br>ABRACL<br>ICE1<br>FOXD3<br>GPR161 |  |  |  |
|----------------------------------------------------------------------------------------------------------------------------------------------------------------------------------------------------------------------------------------------------------------------------------------------------------------------------------------------------------------------------------------------------------|--|--|--|

---

|                                                                                                                                                                                                                                                                                                                                                                                                                                        |  |  |  |
|----------------------------------------------------------------------------------------------------------------------------------------------------------------------------------------------------------------------------------------------------------------------------------------------------------------------------------------------------------------------------------------------------------------------------------------|--|--|--|
| SLC6A15<br>GRHL2<br>SLC35G1<br>CHST14<br>DLX1<br>ZBTB12<br>FRRS1<br>SHOX2<br>LHX2<br>GNB1L<br>NR2C2AP<br>RNF7<br>TMEM132A<br>RPP40<br>PM20D2<br>MORC4<br>PRR14L<br>PROSER3<br>BMP7<br>PDK1<br>DSG3<br>DLK2<br>PRELID3A<br>PTMS<br>FBN2<br>ZKSCAN1<br>PLEKHG6<br>EMILIN3<br>DDX21<br>SLC9A3R1<br>TRIM16L<br>CDCA7L<br>RYK<br>USH1G<br>OTULIN<br>TP63<br>FAM161A<br>EHHADH<br>LDLRAD3<br>DMRT3<br>TMEM161A<br>CCDC51<br>NMNAT3<br>POLR2A |  |  |  |
|----------------------------------------------------------------------------------------------------------------------------------------------------------------------------------------------------------------------------------------------------------------------------------------------------------------------------------------------------------------------------------------------------------------------------------------|--|--|--|

---

|                                                                                                                                                                                                                                                                                                                                                                                                                        |  |  |  |
|------------------------------------------------------------------------------------------------------------------------------------------------------------------------------------------------------------------------------------------------------------------------------------------------------------------------------------------------------------------------------------------------------------------------|--|--|--|
| MRPL4<br>CABLES2<br>TMLHE<br>ZNF598<br>RHBDD3<br>NDRG4<br>PAX6<br>KIAA1549<br>FBXL19<br>JUP<br>SLC39A6<br>IGF2BP1<br>BDH1<br>SYT14<br>ADM<br>DSG2<br>CALML3<br>SEMA3F<br>TFAP2A<br>FSD1<br>EPHA7<br>HS6ST1<br>CRYBB3<br>FAM117B<br>PCYT1B<br>ERMP1<br>NKAIN1<br>ULK1<br>ISL2<br>PARD3<br>FBXL14<br>PRRC2A<br>PRDM13<br>ZIC2<br>ADD2<br>ZNF703<br>ITGA6<br>BCL11A<br>KMT2B<br>CELSR2<br>CERS6<br>GPC2<br>TUFT1<br>HSPH1 |  |  |  |
|------------------------------------------------------------------------------------------------------------------------------------------------------------------------------------------------------------------------------------------------------------------------------------------------------------------------------------------------------------------------------------------------------------------------|--|--|--|

---

|                                                                                                                                                                                                                                                                                                                                                                                                                           |  |  |  |
|---------------------------------------------------------------------------------------------------------------------------------------------------------------------------------------------------------------------------------------------------------------------------------------------------------------------------------------------------------------------------------------------------------------------------|--|--|--|
| LLGL1<br>TMEM106C<br>ARNTL2<br>KHDC1<br>CABYR<br>HIST1H2BH<br>SQLE<br>ADA<br>CLDND1<br>FAM131A<br>SLC1A5<br>TRPV4<br>WASF2<br>PNN<br>VDAC3<br>RAG1<br>CORO6<br>STK38L<br>SOX12<br>RAPGEFL1<br>HECA<br>DAPL1<br>SLC25A36<br>COCH<br>PTHLH<br>MAP3K4<br>EIF4A2<br>PRKCI<br>KRT5<br>RIMS2<br>FZD6<br>CDK6<br>BOLA2-<br>SMG1P6<br>TCTEX1D2<br>SREBF2<br>MCCC1<br>CNIH2<br>EFS<br>HAUS1<br>EXOC6B<br>SOWAHC<br>ACOT7<br>FBXO41 |  |  |  |
|---------------------------------------------------------------------------------------------------------------------------------------------------------------------------------------------------------------------------------------------------------------------------------------------------------------------------------------------------------------------------------------------------------------------------|--|--|--|

---

|                                                                                                                                                                                                                                                                                                                                                                                                                       |  |  |  |
|-----------------------------------------------------------------------------------------------------------------------------------------------------------------------------------------------------------------------------------------------------------------------------------------------------------------------------------------------------------------------------------------------------------------------|--|--|--|
| TRIM16<br>P2RY1<br>RHEBL1<br>NUDT11<br>MZT1<br>KREMEN2<br>ADRA2B<br>MRAP2<br>PGD<br>C1QBP<br>CASK<br>GABRR1<br>JAG1<br>PARD6G<br>NPM3<br>PPP2R3B<br>COL4A6<br>H2AFY2<br>EDARADD<br>C21orf58<br>HOXA13<br>KLRG2<br>KCTD15<br>WEE1<br>ATN1<br>DLL1<br>MKRN3<br>NDUFB5<br>PGAM1<br>HLTF<br>PSPH<br>USP46<br>ATP6V1E2<br>RRS1<br>NTS<br>HOXC6<br>GBP6<br>TMEM158<br>CHCHD6<br>TESK2<br>PHLDB3<br>ELF4<br>ZNF280A<br>ABHD3 |  |  |  |
|-----------------------------------------------------------------------------------------------------------------------------------------------------------------------------------------------------------------------------------------------------------------------------------------------------------------------------------------------------------------------------------------------------------------------|--|--|--|

---

|                                                                                                                                                                                                                                                                                                                                                                                                                              |  |  |  |
|------------------------------------------------------------------------------------------------------------------------------------------------------------------------------------------------------------------------------------------------------------------------------------------------------------------------------------------------------------------------------------------------------------------------------|--|--|--|
| ZFYVE9<br>NFE2L2<br>ULBP1<br>RAET1L<br>YBX3<br>ACP7<br>HPDL<br>MAP7D3<br>SOX15<br>LRFN4<br>MYB<br>HOXD10<br>RNF217<br>ARHGEF5<br>BTBD11<br>ISM2<br>PTPRS<br>DSC2<br>RPP25<br>MRPS12<br>CNNM1<br>NCR3LG1<br>DUSP9<br>MAPK12<br>HEY1<br>TRRAP<br>MAPKBP1<br>HSPA1B<br>PRDM11<br>PLEKHG3<br>RELL2<br>CLEC2L<br>ERVMER34-1<br>UCHL1<br>SIX2<br>HOXA11<br>ACVR1C<br>RAVER2<br>FSCN1<br>NKX2-5<br>PFKFB4<br>HMGA2<br>NUMBL<br>RARG |  |  |  |
|------------------------------------------------------------------------------------------------------------------------------------------------------------------------------------------------------------------------------------------------------------------------------------------------------------------------------------------------------------------------------------------------------------------------------|--|--|--|

---

|                                                                                                                                                                                                                                                                                                                                                                                                                    |  |  |  |
|--------------------------------------------------------------------------------------------------------------------------------------------------------------------------------------------------------------------------------------------------------------------------------------------------------------------------------------------------------------------------------------------------------------------|--|--|--|
| PRTFDC1<br>ZNF724<br>TBL1X<br>PPFIA3<br>LRATD1<br>GRHL3<br>TMEM17<br>TCF15<br>STK26<br>PDK3<br>FOXL2<br>NXPE3<br>FAT2<br>PTGFRN<br>SOCS7<br>SERTAD2<br>SCARB1<br>TPD52L1<br>GAST<br>MARCKS<br>STON2<br>CYC1<br>HILPDA<br>CYB5R2<br>TRIM29<br>IRF6<br>LMO4<br>PKP1<br>HTR2C<br>DQX1<br>CLSTN1<br>TNK2<br>PKP2<br>VSNL1<br>FRRS1L<br>GDF11<br>NCK1<br>NT5M<br>PTRZ1<br>TMEM246<br>SLC38A2<br>FZD10<br>BNC1<br>PLXNA1 |  |  |  |
|--------------------------------------------------------------------------------------------------------------------------------------------------------------------------------------------------------------------------------------------------------------------------------------------------------------------------------------------------------------------------------------------------------------------|--|--|--|



---

|                                                                                                                                                                                                                                                                                                                                                                                                         |  |  |  |
|---------------------------------------------------------------------------------------------------------------------------------------------------------------------------------------------------------------------------------------------------------------------------------------------------------------------------------------------------------------------------------------------------------|--|--|--|
| ALDOC<br>ARHGEF4<br>DST<br>FAM43A<br>IL22RA1<br>ADH7<br>PSIP1<br>RIPPLY3<br>ME1<br>A4GALT<br>FST<br>TINCR<br>SEPTIN5<br>POMC<br>NPPC<br>TMEM97<br>KRT6A<br>COLEC11<br>CYP4F3<br>DNAJB1<br>COL4A5<br>RASSF9<br>POPDC3<br>TRIB3<br>NCS1<br>PITX1<br>FJX1<br>KRT13<br>FOXK1<br>UCN2<br>TMTC1<br>CEL<br>ATRN<br>CHRN4<br>FOLH1<br>POMK<br>XCL1<br>PRKG2<br>PTPRF<br>SYT1<br>MYC<br>IGF1R<br>SLC4A11<br>DDR1 |  |  |  |
|---------------------------------------------------------------------------------------------------------------------------------------------------------------------------------------------------------------------------------------------------------------------------------------------------------------------------------------------------------------------------------------------------------|--|--|--|

---

|                                                                                                                                                                                                                                                                                                                                                                                                                     |  |  |  |
|---------------------------------------------------------------------------------------------------------------------------------------------------------------------------------------------------------------------------------------------------------------------------------------------------------------------------------------------------------------------------------------------------------------------|--|--|--|
| C21orf91<br>SLC2A12<br>WDR54<br>ALX1<br>CERS3<br>SLC9A2<br>ZNF280B<br>LYPD6B<br>AP3B2<br>DGKA<br>FADS2<br>OXCT1<br>BID<br>SLC5A12<br>KRT15<br>SMOX<br>CSTA<br>TSPAN33<br>GJB7<br>FAM171B<br>COLGALT2<br>FRAS1<br>WIPF3<br>NETO2<br>SORD<br>PHLDB2<br>G6PD<br>UGT1A6<br>TSKU<br>PAX9<br>TMEM40<br>GJB5<br>CHST7<br>FAM181B<br>BEX3<br>DZIP1<br>STAR<br>CIB2<br>ETNK2<br>SNAI2<br>LAMA1<br>CDC25B<br>SH2D5<br>MAGEA11 |  |  |  |
|---------------------------------------------------------------------------------------------------------------------------------------------------------------------------------------------------------------------------------------------------------------------------------------------------------------------------------------------------------------------------------------------------------------------|--|--|--|

---

|                                                                                                                                                                                                                                                                                                                                                                                                                    |  |  |  |
|--------------------------------------------------------------------------------------------------------------------------------------------------------------------------------------------------------------------------------------------------------------------------------------------------------------------------------------------------------------------------------------------------------------------|--|--|--|
| SLC51A<br>UAP1L1<br>SEMA6A<br>KLHL24<br>RND3<br>PTH2R<br>SLC12A8<br>GCLM<br>PAK5<br>GJA3<br>ACKR3<br>CHODL<br>ATF5<br>CNTN1<br>KIAA1671<br>GPR156<br>FZD7<br>PPFIA4<br>EEDP1<br>TPRG1<br>STOX2<br>SRXN1<br>SYNGR1<br>PPP2R2C<br>FAM83C<br>FOXN1<br>RNF165<br>UGT1A7<br>GDA<br>DGKG<br>INHBE<br>NUP210<br>MYCL<br>CLGN<br>SCD<br>PRMT6<br>LIMK2<br>RGMA<br>BAG4<br>GNG4<br>CDK5RAP2<br>CACNA2D3<br>PPP1R3G<br>LYPD3 |  |  |  |
|--------------------------------------------------------------------------------------------------------------------------------------------------------------------------------------------------------------------------------------------------------------------------------------------------------------------------------------------------------------------------------------------------------------------|--|--|--|

---

|                                                                                                                                                                                                                                                                                                                                                                                                                                        |  |  |  |
|----------------------------------------------------------------------------------------------------------------------------------------------------------------------------------------------------------------------------------------------------------------------------------------------------------------------------------------------------------------------------------------------------------------------------------------|--|--|--|
| RND2<br>GPC1<br>PLEKHG4<br>HOXB13<br>NDUFA4L2<br>EYA2<br>PLEKHG5<br>DCAF12L2<br>ELOVL6<br>NEURL1<br>SERPINB13<br>KRT6B<br>SEMA6D<br>PRIMA1<br>KRT31<br>FRMD6<br>NECAB2<br>FOXL2NB<br>DENND2C<br>C12orf75<br>ELOVL2<br>MID1<br>INA<br>AK4<br>CHRNA5<br>CD9<br>TP73<br>CD109<br>PNPLA3<br>KRT17<br>OGDHL<br>ADGRL3<br>KLHL5<br>RBM38<br>MCOLN3<br>TMPRSS11F<br>GPRC5D<br>RAP2B<br>C1QL1<br>UPK1B<br>SHROOM2<br>ANKRD2<br>ALOX12<br>SPHK1 |  |  |  |
|----------------------------------------------------------------------------------------------------------------------------------------------------------------------------------------------------------------------------------------------------------------------------------------------------------------------------------------------------------------------------------------------------------------------------------------|--|--|--|

---

|                                                                                                                                                                                                                                                                                                                                                                                                                                |  |  |  |
|--------------------------------------------------------------------------------------------------------------------------------------------------------------------------------------------------------------------------------------------------------------------------------------------------------------------------------------------------------------------------------------------------------------------------------|--|--|--|
| GNAZ<br>CLCA2<br>BICDL1<br>CHAC1<br>FADS1<br>SIX4<br>PRDX1<br>P3H4<br>PMAIP1<br>VAX2<br>IGSF3<br>CDHR1<br>SNX31<br>MAP1B<br>LTB4R<br>HIST1H3B<br>HOXA9<br>NRN1<br>CKMT1B<br>SLC20A2<br>ALDH3B2<br>RAB6B<br>MPPED1<br>JAG2<br>ALG1L<br>ARHGEF25<br>PHF24<br>CACNA2D1<br>KLC3<br>FGFBP1<br>HIST1H2BJ<br>RHCG<br>GSTA4<br>TBX1<br>KIAA1549L<br>B3GALNT1<br>NOTCH1<br>CCL26<br>HOXB7<br>TRO<br>GPRC5B<br>DNAJB4<br>TMSB15A<br>GJC1 |  |  |  |
|--------------------------------------------------------------------------------------------------------------------------------------------------------------------------------------------------------------------------------------------------------------------------------------------------------------------------------------------------------------------------------------------------------------------------------|--|--|--|

---

|                                                                                                                                                                                                                                                                                                                                                                                                                               |  |  |  |
|-------------------------------------------------------------------------------------------------------------------------------------------------------------------------------------------------------------------------------------------------------------------------------------------------------------------------------------------------------------------------------------------------------------------------------|--|--|--|
| BIK<br>F12<br>MAMSTR<br>KCNK2<br>HR<br>LPAR3<br>LAMA5<br>PLEKHH1<br>SLC1A4<br>TMPRSS11A<br>CENPV<br>CBX6<br>SERPINE2<br>IGFBP2<br>SOHLH1<br>SDK1<br>ABCB6<br>SLC39A14<br>A2ML1<br>TDRD5<br>ST6GALNAC2<br>LEF1<br>SLC7A11<br>NEO1<br>AJUBA<br>CYP26A1<br>FERMT1<br>TBX18<br>DNM1<br>HOXC9<br>TENM2<br>JAKMIP3<br>HOXD9<br>SPTBN2<br>CSAG3<br>MAGEA4<br>LHX5<br>AKR1B10<br>ASCL2<br>MMP12<br>ARHGAP33<br>ZP3<br>PPM1L<br>FBXO17 |  |  |  |
|-------------------------------------------------------------------------------------------------------------------------------------------------------------------------------------------------------------------------------------------------------------------------------------------------------------------------------------------------------------------------------------------------------------------------------|--|--|--|

---

|                                                                                                                                                                                                                                                                                                                                                                                                                      |  |  |  |
|----------------------------------------------------------------------------------------------------------------------------------------------------------------------------------------------------------------------------------------------------------------------------------------------------------------------------------------------------------------------------------------------------------------------|--|--|--|
| NOTCH3<br>KRT16<br>CAMK2N2<br>FGFR2<br>HIST1H2AG<br>MIF<br>KLF4<br>DPYSL4<br>TXNRD1<br>TMEM171<br>NRG1<br>SNCA<br>MAGEA3<br>ULBP3<br>EPHB3<br>MAGEA6<br>ABCA13<br>TUBB4A<br>POU6F2<br>PKP3<br>KRT33A<br>WNT3A<br>NELL2<br>KIF1A<br>EN1<br>GPX2<br>RTN4R<br>CYP4F11<br>DMRTA2<br>TMEM79<br>SPRR2A<br>KLF5<br>HIST1H2BO<br>IL23A<br>GPRIN1<br>UGT8<br>GAL<br>ADGRB2<br>EPN3<br>ODC1<br>PLA2R1<br>XG<br>EDDM13<br>KRT77 |  |  |  |
|----------------------------------------------------------------------------------------------------------------------------------------------------------------------------------------------------------------------------------------------------------------------------------------------------------------------------------------------------------------------------------------------------------------------|--|--|--|

---

|                                                                                                                                                                                                                                                                                                                                                                                                                         |  |  |  |
|-------------------------------------------------------------------------------------------------------------------------------------------------------------------------------------------------------------------------------------------------------------------------------------------------------------------------------------------------------------------------------------------------------------------------|--|--|--|
| PCSK9<br>LTB4R2<br>NAV1<br>CLDN20<br>TNS4<br>TUSC3<br>LY6G6C<br>MERTK<br>CKMT1A<br>SPRR1A<br>MB21D2<br>ZIC1<br>GRHL1<br>C16orf74<br>NOS2<br>ANXA8<br>SDK2<br>ARHGEF26<br>RAC3<br>NTN1<br>CYP2S1<br>ADGRL1<br>MATN2<br>STYK1<br>ULBP2<br>GAP43<br>FETUB<br>WNT2B<br>SGK1<br>YJEFN3<br>ARHGEF19<br>MLF1<br>SERPINB2<br>TXN<br>KRT6C<br>GPNMB<br>ARL4D<br>CAPNS2<br>TRIM7<br>CALB1<br>BCL2L10<br>ARHGAP23<br>SOST<br>CADM4 |  |  |  |
|-------------------------------------------------------------------------------------------------------------------------------------------------------------------------------------------------------------------------------------------------------------------------------------------------------------------------------------------------------------------------------------------------------------------------|--|--|--|



---

|                                                                                                                                                                                                                                                                                                                                                                                                                              |  |  |  |
|------------------------------------------------------------------------------------------------------------------------------------------------------------------------------------------------------------------------------------------------------------------------------------------------------------------------------------------------------------------------------------------------------------------------------|--|--|--|
| IRX4<br>AMOTL1<br>HOXA3<br>EPHB1<br>MAPK8IP2<br>RPL22L1<br>CSAG2<br>TUB<br>DIRAS2<br>HOXC13<br>RIPPLY2<br>CIART<br>GJB3<br>FAM171A2<br>RPRM<br>GLI2<br>C10orf99<br>SIPA1L2<br>SERPINB12<br>PLAAT1<br>KRT14<br>HOXD8<br>GPR50<br>EPHA1<br>GALNT13<br>GJB6<br>PI3<br>PLOD2<br>ITGB8<br>COLCA2<br>MDGA1<br>GRIN2D<br>ALDH1A1<br>HCAR3<br>GSTM3<br>GPC3<br>PLA2G3<br>PTGR1<br>GSTM4<br>MCC<br>DSG1<br>STEAP1B<br>EFNB1<br>TFAP2C |  |  |  |
|------------------------------------------------------------------------------------------------------------------------------------------------------------------------------------------------------------------------------------------------------------------------------------------------------------------------------------------------------------------------------------------------------------------------------|--|--|--|

---

|                                                                                                                                                                                                                                                                                                                                                                                                                                   |  |  |  |
|-----------------------------------------------------------------------------------------------------------------------------------------------------------------------------------------------------------------------------------------------------------------------------------------------------------------------------------------------------------------------------------------------------------------------------------|--|--|--|
| JAKMIP2<br>KCNJ2<br>CITED4<br>VWDE<br>BCL2<br>SPRR3<br>SLCO3A1<br>SCD5<br>FOSL1<br>SOSTDC1<br>GSR<br>WNT5A<br>SLC7A8<br>PLAC1<br>SEMA3D<br>C6orf15<br>EPHB6<br>CYP2W1<br>SIX3<br>OSR2<br>PLCB4<br>TUBB2B<br>NUDT10<br>TUBB6<br>FGFBP2<br>TMPRSS11D<br>PLCXD2<br>C12orf54<br>MAGEA1<br>KRT19<br>ROBO1<br>SPOCK1<br>HOXB9<br>CLDN1<br>RUNX3<br>SEPTIN3<br>HIST1H2AE<br>ALDH3A1<br>PADI3<br>RHOV<br>HCAR2<br>AKR1C2<br>GJB4<br>NDRG1 |  |  |  |
|-----------------------------------------------------------------------------------------------------------------------------------------------------------------------------------------------------------------------------------------------------------------------------------------------------------------------------------------------------------------------------------------------------------------------------------|--|--|--|

---

|                                                                                                                                                                                                                                                                                                                                                                                                        |  |  |  |
|--------------------------------------------------------------------------------------------------------------------------------------------------------------------------------------------------------------------------------------------------------------------------------------------------------------------------------------------------------------------------------------------------------|--|--|--|
| GPR87<br>QRFPR<br>SPRR2E<br>RBP1<br>SFN<br>BCL11B<br>STC1<br>NAP1L2<br>CALML5<br>UST<br>IFI16<br>PGF<br>LRRC4<br>NEFL<br>JPH1<br>LGALS7<br>LGALS7B<br>CBLC<br>BEX2<br>FAM171A1<br>GSTM2<br>PGBD5<br>MEX3A<br>MT1X<br>PANX2<br>RPTN<br>MN1<br>MAGEB2<br>SLC4A3<br>HSPB1<br>POF1B<br>CCDC190<br>TGM1<br>KRT78<br>SULT4A1<br>SLC39A2<br>OVOL1<br>YBX2<br>CDKN2A<br>NPBWR1<br>GJA1<br>BEX1<br>GHR<br>CSAG1 |  |  |  |
|--------------------------------------------------------------------------------------------------------------------------------------------------------------------------------------------------------------------------------------------------------------------------------------------------------------------------------------------------------------------------------------------------------|--|--|--|

---

|                                                                                                                                                                                                                                                                                                                                                                                                                                 |  |  |  |
|---------------------------------------------------------------------------------------------------------------------------------------------------------------------------------------------------------------------------------------------------------------------------------------------------------------------------------------------------------------------------------------------------------------------------------|--|--|--|
| AKR1C1<br>F2RL2<br>DLL3<br>COL9A3<br>ANXA8L1<br>S100A2<br>CNFN<br>MAGEA10<br>TNFRSF18<br>KRT75<br>FOXI3<br>TGM3<br>LAMA3<br>OSGIN1<br>CGREF1<br>WFDC5<br>NGFR<br>FABP5<br>HES2<br>DKK1<br>GLYATL2<br>GPR27<br>HOXB8<br>FAM110C<br>HOXC10<br>TSPAN18<br>CA12<br>NPTXR<br>IGFBP5<br>CRYBG2<br>NR0B1<br>CBR3<br>CCNA1<br>FHOD3<br>SBSN<br>SPRR1B<br>MAGEA12<br>IL1R2<br>SPRR2G<br>SPRR2D<br>BARX1<br>IL20RB<br>TWIST1<br>HIST1H2BG |  |  |  |
|---------------------------------------------------------------------------------------------------------------------------------------------------------------------------------------------------------------------------------------------------------------------------------------------------------------------------------------------------------------------------------------------------------------------------------|--|--|--|

---

|                                                                                                                                                                                                                                                                                                                                                                                                                                 |  |  |  |
|---------------------------------------------------------------------------------------------------------------------------------------------------------------------------------------------------------------------------------------------------------------------------------------------------------------------------------------------------------------------------------------------------------------------------------|--|--|--|
| PGLYRP3<br>PTN<br>SULF2<br>EGLN3<br>ADAM12<br>CHST2<br>SERPINB3<br>TP53AIP1<br>KRTDAP<br>CRABP1<br>CHP2<br>PLCH2<br>ATP12A<br>C1QTNF12<br>LGR5<br>NSG1<br>PRSS21<br>COL17A1<br>WNT11<br>SESN3<br>SERPINB7<br>ITGB4<br>GABRE<br>TSPYL5<br>FXD3<br>SPTSSB<br>LY6K<br>DACT2<br>HIST3H2A<br>SFRP1<br>AMTN<br>FGFR3<br>MMP10<br>CALB2<br>ZBTB7C<br>PRR15<br>AKR1B15<br>SPRR2F<br>RNASE7<br>HAS3<br>IGFL1<br>GSDMC<br>ABCC2<br>AKR1C3 |  |  |  |
|---------------------------------------------------------------------------------------------------------------------------------------------------------------------------------------------------------------------------------------------------------------------------------------------------------------------------------------------------------------------------------------------------------------------------------|--|--|--|

---

|                                                                                                                                                                                               |  |  |  |
|-----------------------------------------------------------------------------------------------------------------------------------------------------------------------------------------------|--|--|--|
| GJB2<br>GSTA1<br>IL36RN<br>IL1RN<br>SERPINB4<br>VTCN1<br>CDH3<br>CHGB<br>CLCA4<br>TMPRSS11E<br>IL1A<br>PEG10<br>S100A7<br>TNNT1<br>CA9<br>DDX3Y<br>IL36G<br>KLK10<br>CES1<br>RPS4Y1<br>S100A8 |  |  |  |
|-----------------------------------------------------------------------------------------------------------------------------------------------------------------------------------------------|--|--|--|
